# Supplementary material for: Descriptive Epidemiology of Typhoid Fever during an Epidemic in Harare, Zimbabwe, 2012
Source: PLoS One. 2014 Dec 8;9(12):e114702. doi: 10.1371/journal.pone.0114702 (PMC4259398; doi:10.1371/journal.pone.0114702)
Supplement: S1 Supporting Information — R code for sequential generation of random control points within a polygon shapefile. (R) [file pone.0114702.s002.r]

samp <- function(sect, points, dis = "dis", crs){
    
    s1 <- x@polygons[sect[1]]
    se1 <- SpatialPolygonsDataFrame(SpatialPolygons(s1,proj4string=CRS(proj4string(x))), data=x@data[sect,])
    
    try1 <- dotsInPolys(se1, as.integer(c(points)))
    
    proj4string(try1) <- CRS("+proj=longlat")
    
    tf <- dis
    
    SGqk <- GE_SpatialGrid(try1)
    png(file = paste(tf, ".png", sep = ""), width = SGqk$width, height = SGqk$height, bg = "transparent")
    par(mar = c(0,0,0,0), xaxs = "i", yaxs = "i")
    plot(try1, xlim = SGqk$xlim, ylim = SGqk$ylim, setParUsrBB = TRUE, col = 2)
    dev.off()
    kmlOverlay(SGqk, paste(tf, ".kml", sep = ""), paste(tf, ".png", sep = ""))
    
    writePointsShape(try1, paste(tf, ".shp", sep = ""), factor2char = TRUE, max_nchar = 254)
    
    writeOGR(try1, paste(tf, "v.kml", sep = ""), "Quakes", "KML")
    
}

KMLtoGPX <- function (kmlfile, tf, ignoreAltitude = TRUE) 
{
    if (missing(kmlfile)) 
        stop("kmlfile is missing")
    kml <- paste(readLines(kmlfile, encoding = "UTF-8"), collapse = " ")
    re <- "<coordinates> *([^<]+?) *<\\/coordinates>"
    mtchs <- gregexpr(re, kml)[[1]]
    attr(mtchs, "match.length")<-attr(mtchs, "match.length")-1
    coords <- list()
    for (i in 1:(length(mtchs))) {
        kmlCoords <<- unlist(strsplit(gsub(re, "\\1", substr(kml, 
                                                             mtchs[i], (mtchs[i] + attr(mtchs, "match.length")[i])), 
                                           perl = TRUE), split = " "))
        m <<- t(as.matrix(sapply(kmlCoords, function(x) as.numeric(unlist(strsplit(x, 
                                                                                   ","))), USE.NAMES = FALSE)))
        if (!ignoreAltitude && dim(m)[2] != 3) 
            message(paste("no altitude values for KML object", 
                          i))
        coords <- append(coords, ifelse(ignoreAltitude, list(m[, 
                                                               1:2]), list(m)))
    }
    coords<-data.frame(coords)
    names(coords)<-c(1:length(coords[1,]))
    coords<-data.frame(long=as.double(coords[1,]),lat=as.double(coords[2,]))
    coords1<-data.frame(id=c(1:length(coords$lon)))
    coords1<-cbind(coords1,coords)
    writeGPX(coords1, paste(tf, ".gpx", sep=""),type="w")	
    dat1<<-coords1
    write.csv(coords1, paste(tf, ".csv", sep=""))
    coords
    
}


## Load packages
library(sp)
library(maptools)
library(rgdal)
library(pgirmess)

## Read the polygon file
x <- readShapePoly("harare surbarbs.shp")

## Select the number of points that you want (second number) and the name of the file
samp(133, 2000, "Dzivaresekwa")
samp(129, 2000, "Kuwadzana")

## Transform KML into GPX to read in the GPS
zz1 <- KMLtoGPX("harare_training_locators.kml", "harare_training_locators")
